# Supplementary material for: Ameliorative Effect of Citrus Lemon Peel Extract and Resveratrol on Premature Ovarian Failure Rat Model: Role of iNOS/Caspase-3 Pathway
Source: MDPI journal article supplement (doi:10.3390/molecules28010122), 2022-12-23
Supplement: s1 [file s1]

A)

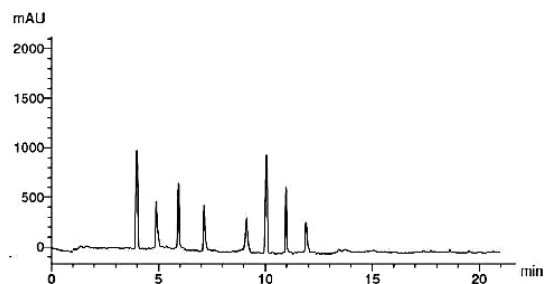

| RT#  | Compound     | Concentration<br>µg/ml |
|------|--------------|------------------------|
| 4.0  | Naringin     | 10.66                  |
| 5.0  | Rutin        | 7.15                   |
| 6.0  | 7-OH flavone | 8.32                   |
| 7.0  | Quercetin    | 6.78                   |
| 9.0  | Luteolin     | 4.06                   |
| 10.0 | Kampferol    | 10.58                  |
| 11.0 | Hesperidin   | 8.86                   |
| 12.0 | Catechin     | 2.56                   |

B)

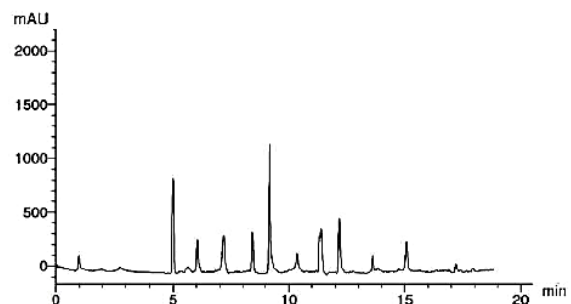

| RT#  | Compound   | Concentration<br>µg/ml |
|------|------------|------------------------|
| 5.0  | Syringenic | 8.23                   |
| 6.0  | p-coumaric | 2.14                   |
| 7.0  | Cinnamic   | 3.06                   |
| 8.2  | Caffeic    | 2.55                   |
| 9.2  | pyrogallol | 13.37                  |
| 10.0 | Gallic     | 1.22                   |
| 11.2 | Ferulic    | 4.87                   |
| 12.0 | Salicylic  | 5.16                   |
| 15.0 | Benzoic    | 2.55                   |

C)

RT: 0.05 - 37.85 SM: 15B

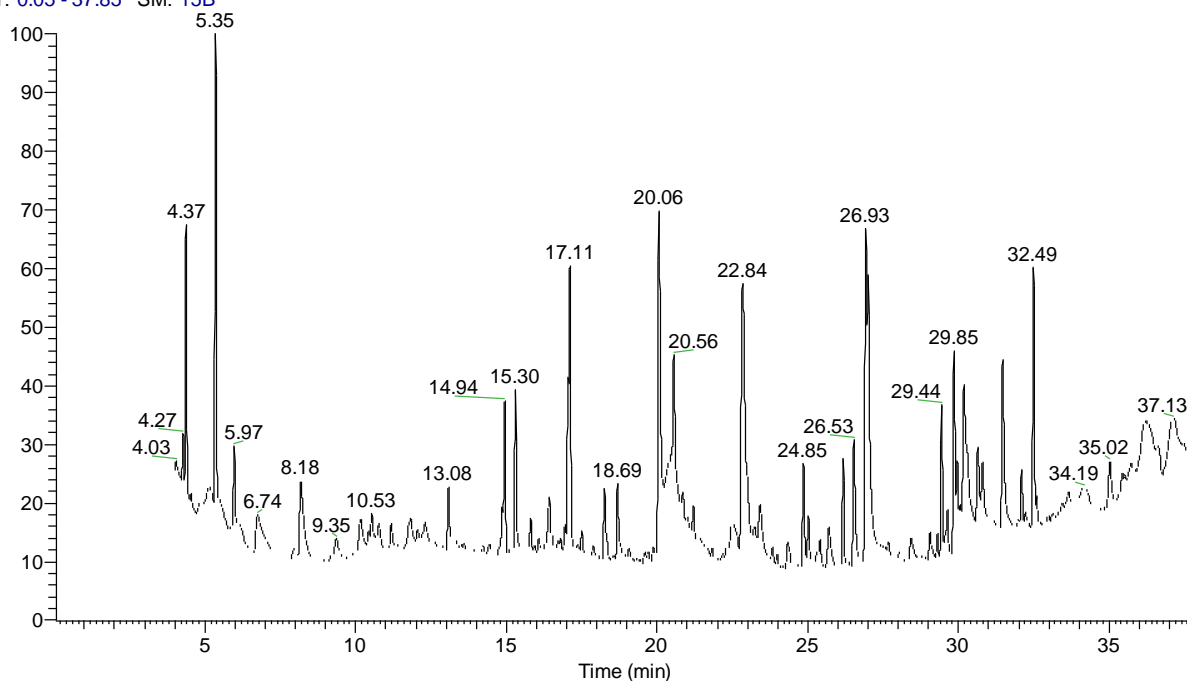

NL:  
1.92E8  
TIC MS  
Limonene

| Compound number | Retention time | Compound name   | Area% | Molecular weight | Molecular formula                            |
|-----------------|----------------|-----------------|-------|------------------|----------------------------------------------|
| 1               | 4.27           | (+)-SABINENE    | 0.78  | 136              | C <sub>10</sub> H <sub>16</sub>              |
| 2               | 4.37           | α-Pinene        | 4.18  | 136              | C <sub>10</sub> H <sub>16</sub>              |
| 3               | 5.35           | Limonene        | 7.67  | 136              | C <sub>10</sub> H <sub>16</sub>              |
| 4               | 5.97           | 3-Carene        | 1.55  | 136              | C <sub>10</sub> H <sub>16</sub>              |
| 5               | 8.17           | 4H-Pyran-4-one, | 1.92  | 144              | C <sub>6</sub> H <sub>8</sub> O <sub>4</sub> |

| 2,3-dihydro-3,5-dihydroxy-6-methyl- |       |                                                                                                 |       |     |           |
|-------------------------------------|-------|-------------------------------------------------------------------------------------------------|-------|-----|-----------|
| 6                                   | 13.07 | 1,2,3-PROPANETRIOL,<br>TRIACETATE                                                               | 1.73  | 218 | C9H14O6   |
| 7                                   | 14.87 | trans-Farnesol                                                                                  | 0.59  | 222 | C15H26O   |
| 8                                   | 14.94 | Caryophyllene                                                                                   | 2.06  | 204 | C15H24    |
| 9                                   | 15.30 | cis-à-Bergamotene                                                                               | 2.87  | 204 | C15H24    |
| 10                                  | 15.81 | 2,6,10-DODECATRIEN-1-OL,<br>3,7,11-TRIMETHYL-                                                   | 0.60  | 222 | C15H26O   |
| 11                                  | 16.43 | à-ylangene                                                                                      | 1.19  | 204 | C15H24    |
| 12                                  | 17.04 | à-Farnesene                                                                                     | 2.36  | 204 | C15H24    |
| 13                                  | 17.11 | á-Bisabolene                                                                                    | 4.57  | 204 | C15H24    |
| 14                                  | 18.25 | ç-Elementene                                                                                    | 1.24  | 204 | C15H24    |
| 15                                  | 18.69 | (-)-Spathulenol                                                                                 | 1.56  | 220 | C15H24O   |
| 16                                  | 20.06 | Phenol, 2-ethoxy-5-(1-propenyl)-                                                                | 8.07  | 178 | C11H14O2  |
| 17                                  | 20.56 | Tetradecane, 2,6,10-trimethyl-                                                                  | 2.98  | 240 | C17H36    |
| 18                                  | 21.20 | Epiglobulol                                                                                     | 0.54  | 222 | C15H26O   |
| 19                                  | 22.84 | á-D-Glucopyranose,<br>4-O-á-D-galactopyranosyl-                                                 | 10.11 | 342 | C12H22O11 |
| 20                                  | 26.17 | Hexadecanoic acid, methyl ester                                                                 | 1.90  | 270 | C17H34O2  |
| 21                                  | 26.53 | Cyperenone                                                                                      | 2.65  | 218 | C15H22O   |
| 22                                  | 26.93 | n-Hexadecanoic acid                                                                             | 5.76  | 256 | C16H32O2  |
| 23                                  | 27.00 | 2H-1-Benzopyran-2-one,<br>5,7-dimethoxy                                                         | 4.65  | 206 | C11H10O4  |
| 24                                  | 29.44 | 11-Octadecenoic acid, methyl ester                                                              | 2.58  | 296 | C19H36O2  |
| 25                                  | 29.85 | 2,5-Cyclohexadiene-1,4-dione,<br>2,5-bis(1,1-dimethylpropyl)-                                   | 3.73  | 248 | C16H24O2  |
| 26                                  | 29.96 | Heptadecanoic acid, 9-methyl-,<br>methyl ester                                                  | 1.07  | 298 | C19H38O2  |
| 27                                  | 30.18 | Oleic Acid                                                                                      | 7.30  | 282 | C18H34O2  |
| 28                                  | 30.80 | Arborescin                                                                                      | 1.40  | 248 | C15H20O3  |
| 29                                  | 31.47 | Pimpinellin                                                                                     | 3.54  | 246 | C13H10O5  |
| 30                                  | 32.10 | 9-Octadecenoic acid (Z)-,<br>2-hydroxy-1-(hydroxymethyl)ethyl<br>ester                          | 1.01  | 356 | C21H40O4  |
| 31                                  | 32.49 | 4a,7,7,10a-Tetramethyldodecahydro<br>benzo[f]chromen-3-ol                                       | 4.69  | 266 | C17H30O2  |
| 32                                  | 35.02 | 2-[4-methyl-6-(2,6,6-trimethylcyclohex-1-enyl)hexa-1,3,5-trienyl]cyclohex-1-en-1-carboxaldehyde | 1.25  | 324 | C23H32O   |
| 33                                  | 36.22 | Ethyl iso-allocholate                                                                           | 0.83  | 436 | C26H44O5  |

Supplementary S1. The chemical composition of Lemon peel extract. (A) Flavonoid HPLC Chromatograph. (B) Phenolics HPLC Chromatograph (C) GC-TSQ mass spectrometer. The total chemical composition contained 33 identified compounds. The main components consist, á-D-Glucopyranose,4-O-á-D-galactopyranosyl 10.11 %, Limonene 7.67 %, Oleic Acid 7.30%, Phenol, 2-ethoxy-5-(1-propenyl)- 8.07% and n-Hexadecanoic acid 5.76%.
